# Supplementary material
Source: ML conference proceedings conference paper supplement (https://openreview.net/forum?id=T0MLnjav7P)
Supplement: supplementary_material [file attachment]

## A APPENDIX

### A.1 PROOF OF EQUIVALENT FORMULATION RESULTS

#### A.1.1 PROOF OF PROPOSITION 1

*Proof.* First we can express  $|\langle \mathbf{x}, \mathbf{a}_i \rangle|^2$  as a function of  $\mathbf{x}^+, \mathbf{x}^-, \mathbf{a}_i^+$ :

$$\begin{aligned} |\langle \mathbf{x}, \mathbf{a}_i \rangle|^2 &= |(\text{Re}(\mathbf{x}) - i\text{Im}(\mathbf{x}))^T (\text{Re}(\mathbf{a}_i) + i\text{Im}(\mathbf{a}_i))|^2 \\ &= (\langle \text{Re}(\mathbf{x}), \text{Re}(\mathbf{a}_i) \rangle + \langle \text{Im}(\mathbf{x}), \text{Im}(\mathbf{a}_i) \rangle)^2 + (\langle \text{Re}(\mathbf{x}), \text{Im}(\mathbf{a}_i) \rangle - \langle \text{Im}(\mathbf{x}), \text{Re}(\mathbf{a}_i) \rangle)^2 \\ &= \langle \mathbf{x}^+, \mathbf{a}_i^+ \rangle^2 + \langle \mathbf{x}^-, \mathbf{a}_i^+ \rangle^2. \end{aligned} \quad (14)$$

We can then rewrite  $f$  as:

$$\begin{aligned} f(\mathbf{x}) &= \sum_i (\langle \mathbf{x}^+, \mathbf{a}_i^+ \rangle^2 + \langle \mathbf{x}^-, \mathbf{a}_i^+ \rangle^2 - \langle \mathbf{x}^{\natural+}, \mathbf{a}_i^+ \rangle^2 - \langle \mathbf{x}^{\natural-}, \mathbf{a}_i^+ \rangle^2)^2 \\ &= \sum_i \left( \langle \mathbf{x}^+, \mathbf{a}_i^+ \rangle^4 + \langle \mathbf{x}^-, \mathbf{a}_i^+ \rangle^4 + \langle \mathbf{x}^{\natural+}, \mathbf{a}_i^+ \rangle^4 + \langle \mathbf{x}^{\natural-}, \mathbf{a}_i^+ \rangle^4 \right. \\ &\quad + 2\langle \mathbf{x}^+, \mathbf{a}_i^+ \rangle^2 \langle \mathbf{x}^-, \mathbf{a}_i^+ \rangle^2 + 2\langle \mathbf{x}^{\natural+}, \mathbf{a}_i^+ \rangle^2 \langle \mathbf{x}^{\natural-}, \mathbf{a}_i^+ \rangle^2 \\ &\quad - 2\langle \mathbf{x}^+, \mathbf{a}_i^+ \rangle^2 \langle \mathbf{x}^{\natural-}, \mathbf{a}_i^+ \rangle^2 - 2\langle \mathbf{x}^-, \mathbf{a}_i^+ \rangle^2 \langle \mathbf{x}^{\natural-}, \mathbf{a}_i^+ \rangle^2 \\ &\quad \left. - 2\langle \mathbf{x}^+, \mathbf{a}_i^+ \rangle^2 \langle \mathbf{x}^{\natural+}, \mathbf{a}_i^+ \rangle^2 - 2\langle \mathbf{x}^-, \mathbf{a}_i^+ \rangle^2 \langle \mathbf{x}^{\natural+}, \mathbf{a}_i^+ \rangle^2 \right). \end{aligned} \quad (15)$$

From here we can notice that the scalar products can be written as scalar products with  $(\mathbf{a}_i^+)^{\otimes 4}$ , indeed for two vectors  $\mathbf{u}, \mathbf{v}$ , we have

$$\begin{aligned} \langle \mathbf{u}, \mathbf{a}_i^+ \rangle^2 \langle \mathbf{v}, \mathbf{a}_i^+ \rangle^2 &= \left( \sum_{i_1} u_{i_1} (\mathbf{a}_i^+)_{i_1} \right) \left( \sum_{i_2} v_{i_2} (\mathbf{a}_i^+)_{i_2} \right) \left( \sum_{i_3} u_{i_3} (\mathbf{a}_i^+)_{i_3} \right) \left( \sum_{i_4} v_{i_4} (\mathbf{a}_i^+)_{i_4} \right) \\ &= \sum_{i_1, i_2, i_3, i_4} (\mathbf{a}_i^+)_{i_1} (\mathbf{a}_i^+)_{i_2} (\mathbf{a}_i^+)_{i_3} (\mathbf{a}_i^+)_{i_4} u_{i_1} u_{i_2} v_{i_3} v_{i_4} \\ &= \langle (\mathbf{a}_i^+)^{\otimes 4}, \mathbf{u} \otimes \mathbf{u} \otimes \mathbf{v} \otimes \mathbf{v} \rangle. \end{aligned} \quad (16)$$

This allows to write  $f$  in the following form:

$$\begin{aligned} f(\mathbf{x}) &= \sum_i \left\langle (\mathbf{a}_i^+)^{\otimes 4}, (\mathbf{x}^+)^{\otimes 4} + (\mathbf{x}^-)^{\otimes 4} + (\mathbf{x}^{\natural+})^{\otimes 4} + (\mathbf{x}^{\natural-})^{\otimes 4} \right. \\ &\quad + 2(\mathbf{x}^+)^{\otimes 2} \otimes (\mathbf{x}^-)^{\otimes 2} + 2(\mathbf{x}^{\natural+})^{\otimes 2} \otimes (\mathbf{x}^{\natural-})^{\otimes 2} \\ &\quad - 2(\mathbf{x}^+)^{\otimes 2} \otimes (\mathbf{x}^{\natural-})^{\otimes 2} - 2(\mathbf{x}^-)^{\otimes 2} \otimes (\mathbf{x}^{\natural-})^{\otimes 2} \\ &\quad \left. - 2(\mathbf{x}^+)^{\otimes 2} \otimes (\mathbf{x}^{\natural+})^{\otimes 2} - 2(\mathbf{x}^-)^{\otimes 2} \otimes (\mathbf{x}^{\natural+})^{\otimes 2} \right\rangle \\ &= \left\langle \sum_i (\mathbf{a}_i^+)^{\otimes 4}, (\mathbf{x}^+)^{\otimes 4} + (\mathbf{x}^-)^{\otimes 4} + (\mathbf{x}^{\natural+})^{\otimes 4} + (\mathbf{x}^{\natural-})^{\otimes 4} \right. \\ &\quad + 2(\mathbf{x}^+)^{\otimes 2} \otimes (\mathbf{x}^-)^{\otimes 2} + 2(\mathbf{x}^{\natural+})^{\otimes 2} \otimes (\mathbf{x}^{\natural-})^{\otimes 2} \\ &\quad - 2(\mathbf{x}^+)^{\otimes 2} \otimes (\mathbf{x}^{\natural-})^{\otimes 2} - 2(\mathbf{x}^-)^{\otimes 2} \otimes (\mathbf{x}^{\natural-})^{\otimes 2} \\ &\quad \left. - 2(\mathbf{x}^+)^{\otimes 2} \otimes (\mathbf{x}^{\natural+})^{\otimes 2} - 2(\mathbf{x}^-)^{\otimes 2} \otimes (\mathbf{x}^{\natural+})^{\otimes 2} \right\rangle. \end{aligned} \quad (17)$$

We get the expected result by choosing:

$$\begin{aligned}
\mathbf{U}(\mathbf{x}^+) &:= (\mathbf{x}^+)^{\otimes 4} + (\mathbf{x}^-)^{\otimes 4} + (\mathbf{x}^{\natural+})^{\otimes 4} + (\mathbf{x}^{\natural-})^{\otimes 4} \\
&\quad + 2(\mathbf{x}^+)^{\otimes 2} \otimes (\mathbf{x}^-)^{\otimes 2} + 2(\mathbf{x}^{\natural+})^{\otimes 2} \otimes (\mathbf{x}^{\natural-})^{\otimes 2} \\
&\quad - 2(\mathbf{x}^+)^{\otimes 2} \otimes (\mathbf{x}^{\natural-})^{\otimes 2} - 2(\mathbf{x}^-)^{\otimes 2} \otimes (\mathbf{x}^{\natural+})^{\otimes 2} \\
&\quad - 2(\mathbf{x}^+)^{\otimes 2} \otimes (\mathbf{x}^{\natural+})^{\otimes 2} - 2(\mathbf{x}^-)^{\otimes 2} \otimes (\mathbf{x}^{\natural-})^{\otimes 2}.
\end{aligned} \tag{18}$$

□

## A.2 PROOF OF LANDSCAPE RESULTS

### A.2.1 PROOF OF PROPOSITION 2

*Proof.* In order to use tensor  $\mathbf{S}$ , it is be useful to notice that:

$$\begin{aligned}
\langle \mathbf{S}, \mathbf{u} \otimes \mathbf{u} \otimes \mathbf{v} \otimes \mathbf{v} \rangle &= \sum_{i_1, i_2, i_3, i_4} \mathbf{S}_{i_1, i_2, i_3, i_4} u_{i_1} u_{i_2} v_{i_3} v_{i_4} \\
&= \sum_{i_1=i_2 \neq i_3=i_4} u_{i_1} u_{i_2} v_{i_3} v_{i_4} \\
&\quad + \sum_{i_1=i_3 \neq i_2=i_4} u_{i_1} u_{i_2} v_{i_3} v_{i_4} \\
&\quad + \sum_{i_1=i_4 \neq i_2=i_3} u_{i_1} u_{i_2} v_{i_3} v_{i_4} \\
&\quad + 3 \sum_{i_1=i_2=i_3=i_4} u_{i_1} u_{i_2} v_{i_3} v_{i_4} \\
&= \|\mathbf{u}\|^2 \|\mathbf{v}\|^2 + 2\langle \mathbf{u}, \mathbf{v} \rangle^2.
\end{aligned} \tag{19}$$

Then we have:

$$\begin{aligned}
c\langle \mathbf{S}, \mathbf{U}(\mathbf{x}^+) \rangle &= c \left( 3\|\mathbf{x}^+\|^4 + 3\|\mathbf{x}^-\|^4 + 3\|\mathbf{x}^{\natural+}\|^4 + 3\|\mathbf{x}^{\natural-}\|^4 \right. \\
&\quad + 2(2\langle \mathbf{x}^+, \mathbf{x}^- \rangle^2 + \|\mathbf{x}^+\|^2 \|\mathbf{x}^-\|^2) + 2(2\langle \mathbf{x}^{\natural+}, \mathbf{x}^{\natural-} \rangle^2 + \|\mathbf{x}^{\natural+}\|^2 \|\mathbf{x}^{\natural-}\|^2) \\
&\quad - 2(2\langle \mathbf{x}^+, \mathbf{x}^{\natural-} \rangle^2 + \|\mathbf{x}^+\|^2 \|\mathbf{x}^{\natural-}\|^2) - 2(2\langle \mathbf{x}^-, \mathbf{x}^{\natural+} \rangle^2 + \|\mathbf{x}^-\|^2 \|\mathbf{x}^{\natural+}\|^2) \\
&\quad \left. - 2(2\langle \mathbf{x}^-, \mathbf{x}^{\natural+} \rangle^2 + \|\mathbf{x}^-\|^2 \|\mathbf{x}^{\natural+}\|^2) - 2(2\langle \mathbf{x}^+, \mathbf{x}^{\natural+} \rangle^2 + \|\mathbf{x}^+\|^2 \|\mathbf{x}^{\natural+}\|^2) \right). \tag{20}
\end{aligned}$$

We can notice that  $\|\mathbf{x}^+\|^2 = \|\mathbf{x}^-\|^2 = \|\mathbf{x}\|^2$ , that  $\langle \mathbf{x}^+, \mathbf{x}^- \rangle = 0$  (and same result holds for  $\mathbf{x}^{\natural}$ ) and that:

$$\begin{aligned}
&\langle \mathbf{x}^+, \mathbf{x}^{\natural+} \rangle^2 + \langle \mathbf{x}^+, \mathbf{x}^{\natural-} \rangle^2 + \langle \mathbf{x}^-, \mathbf{x}^{\natural+} \rangle^2 + \langle \mathbf{x}^-, \mathbf{x}^{\natural-} \rangle^2 \\
&= 2 \left( \langle \text{Re}(\mathbf{x}), \text{Re}(\mathbf{x}^{\natural}) \rangle + \langle \text{Im}(\mathbf{x}), \text{Im}(\mathbf{x}^{\natural}) \rangle \right)^2 + 2 \left( \langle \text{Re}(\mathbf{x}), \text{Im}(\mathbf{x}^{\natural}) \rangle - \langle \text{Im}(\mathbf{x}), \text{Re}(\mathbf{x}^{\natural}) \rangle \right)^2 \\
&= 2|\langle \mathbf{x}, \mathbf{x}^{\natural} \rangle|^2.
\end{aligned} \tag{21}$$

We can thus simplify the previous expression as:

$$c\langle \mathbf{S}, \mathbf{U}(\mathbf{x}) \rangle = 8c \left( \|\mathbf{x}\|^4 + \|\mathbf{x}^{\natural}\|^4 - |\langle \mathbf{x}, \mathbf{x}^{\natural} \rangle|^2 - \|\mathbf{x}\|^2 \|\mathbf{x}^{\natural}\|^2 \right) := g(\mathbf{x}^+).$$

□

### A.2.2 PROOF OF PROPOSITION 3

*Proof.* To simplify notation, we denote  $J = \{(i_1, i_2, i_3, i_4) \mid 1 \leq i_1, i_2, i_3, i_4 \leq 2n\}$  and all summations over  $j$  are for  $j \in J$ . We also write:

$$\mathbf{U}(\mathbf{x}^+) = \sum_{k=1}^K \varepsilon_k \mathbf{x}_{1,k} \otimes \mathbf{x}_{2,k} \otimes \mathbf{x}_{3,k} \otimes \mathbf{x}_{4,k}$$

with  $\mathbf{x}_{i,k} \in \{\mathbf{x}^+, \mathbf{x}^-, \mathbf{x}^{\sharp+}, \mathbf{x}^{\sharp-}\}$  and  $\varepsilon_k = \pm 1$ .

Recall that:

$$\begin{aligned} f(\mathbf{x}^+) &= c\langle \mathbf{T}, \mathbf{U}(\mathbf{x}^+) \rangle \\ g(\mathbf{x}^+) &= c\langle \mathbf{S}, \mathbf{U}(\mathbf{x}^+) \rangle \\ \nabla f(\mathbf{x}^+) &= \sum_j c\mathbf{T}_j \nabla \mathbf{U}_j(\mathbf{x}^+) \\ \nabla g(\mathbf{x}^+) &= \sum_j c\mathbf{S}_j \nabla \mathbf{U}_j(\mathbf{x}^+). \end{aligned} \tag{22}$$

Using this we can write:

$$\begin{aligned} \langle \nabla f(\mathbf{x}^+), \nabla g(\mathbf{x}^+) \rangle &= \langle \nabla g(\mathbf{x}^+), \nabla f(\mathbf{x}^+) \rangle \\ &= \langle \nabla g(\mathbf{x}^+), \sum_j c\mathbf{T}_j \nabla \mathbf{U}_j \rangle \\ &= \langle \nabla g(\mathbf{x}^+), \sum_j c(\mathbf{T}_j - \mathbf{S}_j + \mathbf{S}_j) \nabla \mathbf{U}_j \rangle \\ &= \langle \nabla g(\mathbf{x}^+), \nabla g(\mathbf{x}^+) \rangle + \langle \nabla g(\mathbf{x}^+), \sum_j c(\mathbf{T}_j - \mathbf{S}_j) \nabla \mathbf{U}_j \rangle \\ &= \|\nabla g(\mathbf{x}^+)\|^2 + \sum_i \sum_j (\nabla g(\mathbf{x}^+))_i (\nabla \mathbf{U}_j)_i c(\mathbf{T} - \mathbf{S})_j \\ &= \|\nabla g(\mathbf{x}^+)\|^2 + \sum_i \sum_k \sum_{i_1, i_2, i_3, i_4} (\nabla g(\mathbf{x}^+))_i c(\mathbf{T} - \mathbf{S})_{i_1, i_2, i_3, i_4} \varepsilon_k \\ &\quad \times \left( \frac{\partial(\mathbf{x}_{1,k})_{i_1}}{\partial \mathbf{x}_i^+} (\mathbf{x}_{2,k})_{i_2} (\mathbf{x}_{3,k})_{i_3} (\mathbf{x}_{4,k})_{i_4} \right. \\ &\quad + \frac{\partial(\mathbf{x}_{2,k})_{i_2}}{\partial \mathbf{x}_i^+} (\mathbf{x}_{1,k})_{i_1} (\mathbf{x}_{3,k})_{i_3} (\mathbf{x}_{4,k})_{i_4} \\ &\quad + \frac{\partial(\mathbf{x}_{3,k})_{i_3}}{\partial \mathbf{x}_i^+} (\mathbf{x}_{1,k})_{i_1} (\mathbf{x}_{2,k})_{i_2} (\mathbf{x}_{4,k})_{i_4} \\ &\quad \left. + \frac{\partial(\mathbf{x}_{4,k})_{i_4}}{\partial \mathbf{x}_i^+} (\mathbf{x}_{1,k})_{i_1} (\mathbf{x}_{2,k})_{i_2} (\mathbf{x}_{3,k})_{i_3} \right). \end{aligned} \tag{23}$$

If  $\mathbf{x}_{\ell,k} = \mathbf{x}^+$ , then  $\frac{\partial(\mathbf{x}_{\ell,k})_{i_\ell}}{\partial x_i} = \mathbf{1}_{i=i_\ell}$ . If  $\mathbf{x}_{\ell,k} = \mathbf{x}^-$ , then  $\frac{\partial(\mathbf{x}_{\ell,k})_{i_\ell}}{\partial x_i} = -\mathbf{1}_{i=i_\ell+n}$  if  $i_\ell \leq n$  and  $\mathbf{1}_{i=i_\ell-n}$  otherwise. In each case we can write:

$$\sum_i (\nabla g(\mathbf{x}^+))_i \frac{\partial(\mathbf{x}_{\ell,k})_{i_\ell}}{\partial x_i} = (\mathbf{M}_{\ell,k} \nabla g(\mathbf{x}^+))_{i_\ell}$$

for some  $M_{\ell,k} \in \left\{ I_{2n}, O_{2n}, \begin{pmatrix} O_n & -I_n \\ I_n & O_n \end{pmatrix} \right\}$ . Then we have

$$\begin{aligned}
\langle \nabla f(\mathbf{x}^+), \nabla g(\mathbf{x}^+) \rangle &= \|\nabla g(\mathbf{x}^+)\|^2 + \sum_k \left( c \langle \mathbf{T} - \mathbf{S}, \varepsilon_k \mathbf{M}_{1,k} \nabla g(\mathbf{x}^+) \otimes \mathbf{x}_{2,k} \otimes \mathbf{x}_{3,k} \otimes \mathbf{x}_{4,k} \rangle \right. \\
&\quad + c \langle \mathbf{T} - \mathbf{S}, \varepsilon_k \mathbf{x}_{1,k} \otimes \mathbf{M}_{2,k} \nabla g(\mathbf{x}^+) \otimes \mathbf{x}_{3,k} \otimes \mathbf{x}_{4,k} \rangle \\
&\quad + c \langle \mathbf{T} - \mathbf{S}, \varepsilon_k \mathbf{x}_{1,k} \otimes \mathbf{x}_{2,k} \otimes \mathbf{M}_{3,k} \nabla g(\mathbf{x}^+) \otimes \mathbf{x}_{4,k} \rangle \\
&\quad \left. + c \langle \mathbf{T} - \mathbf{S}, \varepsilon_k \mathbf{x}_{1,k} \otimes \mathbf{x}_{2,k} \otimes \mathbf{x}_{3,k} \otimes \mathbf{M}_{4,k} \nabla g(\mathbf{x}^+) \rangle \right) \\
&\geq \|\nabla g(\mathbf{x}^+)\|^2 - \sum_k \left( c \|\mathbf{T} - \mathbf{S}\|_{\text{op}} \|\varepsilon_k \mathbf{M}_{1,k} \nabla g(\mathbf{x}^+)\| \|\mathbf{x}_{2,k}\| \|\mathbf{x}_{3,k}\| \|\mathbf{x}_{4,k}\| \right. \\
&\quad + c \|\mathbf{T} - \mathbf{S}\|_{\text{op}} \|\varepsilon_k \mathbf{M}_{2,k} \nabla g(\mathbf{x}^+)\| \|\mathbf{x}_{1,k}\| \|\mathbf{x}_{3,k}\| \|\mathbf{x}_{4,k}\| \\
&\quad + c \|\mathbf{T} - \mathbf{S}\|_{\text{op}} \|\varepsilon_k \mathbf{M}_{3,k} \nabla g(\mathbf{x}^+)\| \|\mathbf{x}_{1,k}\| \|\mathbf{x}_{2,k}\| \|\mathbf{x}_{4,k}\| \\
&\quad \left. + c \|\mathbf{T} - \mathbf{S}\|_{\text{op}} \|\varepsilon_k \mathbf{M}_{4,k} \nabla g(\mathbf{x}^+)\| \|\mathbf{x}_{1,k}\| \|\mathbf{x}_{2,k}\| \|\mathbf{x}_{3,k}\| \right) \\
&\geq \|\nabla g(\mathbf{x}^+)\|^2 - \sum_k 4\delta_0 c (\|\mathbf{x}\| + \|\mathbf{x}^\natural\|)^3 \|\nabla g(\mathbf{x}^+)\| \tag{24} \\
&\geq \|\nabla g(\mathbf{x}^+)\|^2 - C_1 \delta_0 c (\|\mathbf{x}\| + \|\mathbf{x}^\natural\|)^3 \|\nabla g(\mathbf{x}^+)\|. \tag{25}
\end{aligned}$$

Assume we have  $\|\nabla g(\mathbf{x}^+)\| \geq C_1 \delta_0 c (\|\mathbf{x}\| + \|\mathbf{x}^\natural\|)^3$ , then in particular  $\nabla g(\mathbf{x}^+) \neq 0$ , and  $\mathbf{x}^\natural \neq 0$ , so inequality (24) is strict and we must have  $\langle \nabla f(\mathbf{x}^+), \nabla g(\mathbf{x}^+) \rangle > 0$ , and therefore  $\nabla f(\mathbf{x}^+) \neq 0$ .  $\square$

### A.2.3 PROOF OF PROPOSITION 4

We denote  $J = \{(i_1, i_2, i_3, i_4) \mid 1 \leq i_1, i_2, i_3, i_4 \leq 2n\}$  and all summations over  $j$  are for  $j \in J$ .

*Proof.* We have:

$$\begin{aligned}
&|\mathbf{u}^T \mathbf{H}_f(\mathbf{x}^+) \mathbf{u} - \mathbf{u}^T \mathbf{H}_g(\mathbf{x}^+) \mathbf{u}| \\
&= \left| \mathbf{u}^T \left( c \sum_{j \in J} (\mathbf{T} - \mathbf{S})_j \mathbf{H}_{\mathbf{u}_j} \right) \mathbf{u} \right| \\
&= \left| \mathbf{u}^T \left( c \sum_{j \in J} \sum_k \varepsilon_k (\mathbf{T} - \mathbf{S})_j \mathbf{H}_{(\mathbf{x}_{1,k} \otimes \mathbf{x}_{2,k} \otimes \mathbf{x}_{3,k} \otimes \mathbf{x}_{4,k})_j} \right) \mathbf{u} \right| \\
&= \left| \mathbf{u}^T \left( c \sum_{i_1, i_2, i_3, i_4} \sum_k \varepsilon_k (\mathbf{T} - \mathbf{S})_{i_1, i_2, i_3, i_4} \right. \right. \\
&\quad \left. \sum_{\sigma \in \mathfrak{S}_4} \frac{1}{2} \frac{\partial (\mathbf{x}_{\sigma(1),k})_{i_{\sigma(1)}}}{\mathbf{x}_i^+} \frac{\partial (\mathbf{x}_{\sigma(2),k})_{i_{\sigma(2)}}}{\mathbf{x}_{i'}^+} (\mathbf{x}_{\sigma(3),k})_{i_{\sigma(3)}} (\mathbf{x}_{\sigma(4),k})_{i_{\sigma(4)}} \right)_{1 \leq i, i' \leq 2n} \mathbf{u} \left. \right| \\
&= \left| c \sum_{i_1, i_2, i_3, i_4} \sum_k \varepsilon_k (\mathbf{T} - \mathbf{S})_{i_1, i_2, i_3, i_4} \right. \\
&\quad \left. \sum_{i, i'} \sum_{\sigma \in \mathfrak{S}_4} \frac{1}{2} \left( u_i \frac{\partial (\mathbf{x}_{\sigma(1),k})_{i_{\sigma(1)}}}{\mathbf{x}_i^+} \right) \left( u_{i'} \frac{\partial (\mathbf{x}_{\sigma(2),k})_{i_{\sigma(2)}}}{\mathbf{x}_{i'}^+} \right) (\mathbf{x}_{\sigma(3),k})_{i_{\sigma(3)}} (\mathbf{x}_{\sigma(4),k})_{i_{\sigma(4)}} \right|. \tag{26}
\end{aligned}$$

As we saw previously in Appendix A.2.2 we can write for some  $M_{\sigma(1),k} \in \left\{ I_{2n}, O_{2n}, \begin{pmatrix} O_n & -I_n \\ I_n & O_n \end{pmatrix} \right\}$ ,

$$\sum_i \left( u_i \frac{\partial (x_{\sigma(1),k})_{i_{\sigma(1)}}}{x_i^+} \right) = (M_{\sigma(1),k} \mathbf{u})_{i_{\sigma(1)}}.$$

Then we have:

$$\begin{aligned} & | \mathbf{u}^T \mathbf{H}_f(\mathbf{x}^+) \mathbf{u} - \mathbf{u}^T \mathbf{H}_g(\mathbf{x}^+) \mathbf{u} | \\ &= \left| c \sum_{i_1, i_2, i_3, i_4} \sum_k \varepsilon_k (\mathbf{T} - \mathbf{S})_{i_1, i_2, i_3, i_4} \right. \\ & \quad \frac{1}{2} \left( (M_{1,k} \mathbf{u})_{i_1} (M_{2,k} \mathbf{u})_{i_2} (x_{3,k})_{i_3} (x_{4,k})_{i_4} + (M_{2,k} \mathbf{u})_{i_2} (M_{1,k} \mathbf{u})_{i_1} (x_{3,k})_{i_3} (x_{4,k})_{i_4} + \right. \\ & \quad \left. \cdots + (M_{4,k} \mathbf{u})_{i_4} (M_{3,k} \mathbf{u})_{i_3} (x_{2,k})_{i_2} (x_{1,k})_{i_1} \right) \left. \right| \\ &= \left| c \sum_k \varepsilon_k \left\langle \mathbf{T} - \mathbf{S}, \right. \right. \\ & \quad \frac{1}{2} \left( (M_{1,k} \mathbf{u}) \otimes (M_{2,k} \mathbf{u}) \otimes (x_{3,k}) \otimes (x_{4,k}) + (M_{1,k} \mathbf{u}) \otimes (M_{2,k} \mathbf{u}) \otimes (x_{3,k}) \otimes (x_{4,k}) + \right. \\ & \quad \left. \cdots + (x_{1,k}) \otimes (x_{2,k}) \otimes (M_{3,k} \mathbf{u}) \otimes (M_{4,k} \mathbf{u}) \right) \left. \right\rangle \left. \right| \\ &\leq c \sum_k \|\mathbf{T} - \mathbf{S}\|_{\text{op}} \sum_{\sigma \in \mathfrak{S}_4} \frac{1}{2} \|M_{\sigma(1),k} \mathbf{u}\| \|M_{\sigma(2),k} \mathbf{u}\| \|x_{\sigma(3),k}\| \|x_{\sigma(4),k}\| \\ &\leq c \sum_k \|\mathbf{T} - \mathbf{S}\|_{\text{op}} \sum_{\sigma \in \mathfrak{S}_4} \frac{1}{2} \|\mathbf{u}\|^2 (\|\mathbf{x}\| + \|\mathbf{x}^\natural\|)^2 \\ &< c \sum_k \delta_0 12 \|\mathbf{u}\|^2 (\|\mathbf{x}\| + \|\mathbf{x}^\natural\|)^2 \\ &\leq C_2 \delta_0 c \|\mathbf{u}\|^2 (\|\mathbf{x}\| + \|\mathbf{x}^\natural\|)^2. \end{aligned} \tag{27}$$

□

#### A.2.4 PROOF OF PROPOSITION 5

*Proof.* We can notice that  $\mathbf{x}^- = M\mathbf{x}^+$  where

$$M := \begin{bmatrix} O_n & -I_n \\ I_n & O_n \end{bmatrix}.$$

It is also well known that:

$$\mathbf{H}_{\|\mathbf{x}\|^2}(x) = 2I_n, \quad \mathbf{H}_{\|M\mathbf{x}\|^4}(x) = 8\mathbf{x}\mathbf{x}^T + 4\|\mathbf{x}\|^2 I_n$$

$$\mathbf{H}_{\langle M\mathbf{x}, \mathbf{a} \rangle^2}(x) = 2(M\mathbf{a})(M\mathbf{a})^T.$$

Thus, the Hessian of  $g$  with respect to  $\mathbf{u}^+$  is given by

$$\mathbf{H}_g(\mathbf{x}^+) = 8c(8\mathbf{x}^+(\mathbf{x}^+)^T + 4\|\mathbf{x}^+\|^2 I_n - 2\mathbf{x}^{\natural+}(\mathbf{x}^{\natural+})^T - 2\mathbf{x}^{\natural-}(\mathbf{x}^{\natural-})^T - \|\mathbf{x}^{\natural+}\|^2 I_n - \|\mathbf{x}^{\natural-}\|^2 I_n).$$

As  $\|\mathbf{x}^{\natural+}\| = \|\mathbf{x}^{\natural-}\|$ , we get the desired result. □

#### A.2.5 PROOF OF PROPOSITION 6

*Proof.* Using Proposition 5 and Proposition 4, we can write:

$$\begin{aligned}
(\mathbf{x}^{\natural+})^T \mathbf{H}_f(\mathbf{x}^+) \mathbf{x}^{\natural+} &< 8c \left( 8\langle \mathbf{x}^+, \mathbf{x}^{\natural+} \rangle^2 + 4\|\mathbf{x}^+\|^2 \|\mathbf{x}^{\natural+}\|^2 - 2\|\mathbf{x}^{\natural+}\|^2 - 2\langle \mathbf{x}^{\natural+}, \mathbf{x}^{\natural-} \rangle^2 - \|\mathbf{x}^{\natural+}\|^4 - \|\mathbf{x}^{\natural+}\|^2 \|\mathbf{x}^{\natural-}\|^2 \right) \\
&+ C_2 \delta_0 c \|\mathbf{x}^{\natural}\|^2 (\|\mathbf{x}\| + \|\mathbf{x}^{\natural}\|)^2 \\
&\leq 8c \left( 8 \left( \langle \text{Re}(\mathbf{x}^{\natural}), \text{Re}(\mathbf{x}) \rangle + \langle \text{Im}(\mathbf{x}^{\natural}), \text{Im}(\mathbf{x}) \rangle \right)^2 + 4\|\mathbf{x}\|^2 \|\mathbf{x}^{\natural}\|^2 - 2\|\mathbf{x}^{\natural}\|^4 - \|\mathbf{x}^{\natural}\|^4 - \|\mathbf{x}^{\natural}\|^4 \right) \\
&+ 2C_2 \delta_0 c \|\mathbf{x}^{\natural}\|^2 (\|\mathbf{x}\|^2 + \|\mathbf{x}^{\natural}\|^2) \\
&\leq 8c(8|\langle \mathbf{x}, \mathbf{x}^{\natural} \rangle|^2 + 4\|\mathbf{x}\|^2 \|\mathbf{x}^{\natural}\|^2 - 4\|\mathbf{x}^{\natural}\|^4) + 2C_2 \delta_0 c \|\mathbf{x}^{\natural}\|^2 (\|\mathbf{x}\|^2 + \|\mathbf{x}^{\natural}\|^2). \tag{28}
\end{aligned}$$

Then as long as the following condition is satisfied, we have  $(\mathbf{x}^{\natural})^T \mathbf{H}_f \mathbf{x}^{\natural} < 0$ :

$$\begin{aligned}
&8c(8|\langle \mathbf{x}, \mathbf{x}^{\natural} \rangle|^2 + 4\|\mathbf{x}\|^2 \|\mathbf{x}^{\natural}\|^2 - 4\|\mathbf{x}^{\natural}\|^4) + 2\delta_0 C_2 c (\|\mathbf{x}\|^2 \|\mathbf{x}^{\natural}\|^2 + \|\mathbf{x}^{\natural}\|^4) \leq 0 \\
\iff &8 \frac{|\langle \mathbf{x}, \mathbf{x}^{\natural} \rangle|^2}{\|\mathbf{x}^{\natural}\|^4} + \left( 4 + \frac{1}{4} \delta_0 C_2 \right) \frac{\|\mathbf{x}\|^2}{\|\mathbf{x}^{\natural}\|^2} \leq \left( 4 - \frac{1}{4} \delta_0 C_2 \right). \tag{29}
\end{aligned}$$

□

## A.2.6 PROOF OF PROPOSITION 7

*Proof.* We borrow the notations from Sun et al. (2018b) and we let:

$$\phi(\mathbf{x}) = \operatorname{argmin}_{\theta \in [0, 2\pi)} \|\mathbf{x} - \mathbf{x}^{\natural} e^{i\theta}\|$$

(And for  $\mathbf{x} \in \operatorname{Span}\{\mathbf{x}^{\natural}, i\mathbf{x}^{\natural}\}^{\perp}$  we just define  $\phi(\mathbf{x}) = 0$ ). Intuitively  $\phi(\mathbf{x})$  is the phase of  $\mathbf{x}$  in the real  $2d$  plane spanned by  $\mathbf{x}^{\natural}$ . This means we can write in particular:

$$\mathbf{x}^+ = r \left( \cos(\phi(\mathbf{x})) \mathbf{x}^{\natural+} + \sin(\phi(\mathbf{x})) \mathbf{x}^{\natural-} \right) + \mathbf{v}$$

with  $\mathbf{v}$  orthogonal to  $\operatorname{Span}\{\mathbf{x}^{\natural+}, \mathbf{x}^{\natural-}\}$ .

Now consider  $\mathbf{u} = r'(\cos(\phi(\mathbf{x}))\mathbf{x}^{\natural+} + \sin(\phi(\mathbf{x}))\mathbf{x}^{\natural-}) + \mathbf{v}'$  such that  $\|\mathbf{u}\| = 1$  and write  $(\mathbf{x}^{\natural})^{\phi(\mathbf{x})} = \cos(\phi(\mathbf{x}))\mathbf{x}^{\natural+} + \sin(\phi(\mathbf{x}))\mathbf{x}^{\natural-}$ , we have

$$\begin{aligned}
\mathbf{u}^T \mathbf{H}_f(\mathbf{x}^+) \mathbf{u} &> \mathbf{u}^T \mathbf{H}_g(\mathbf{x}^+) \mathbf{u} - C_2 \delta_0 c (\|\mathbf{x}^{\natural}\| + \|\mathbf{x}\|)^2 \quad (\text{From Proposition 4}) \\
&= 8c(8\langle \mathbf{u}, \mathbf{x}^+ \rangle^2 + 4\|\mathbf{x}^+\|^2 \|\mathbf{u}\|^2 - 2\langle \mathbf{x}^{\natural+}, \mathbf{u} \rangle^2 - 2\langle \mathbf{x}^{\natural-}, \mathbf{u} \rangle^2 - 2\|\mathbf{x}^{\natural+}\|^2 \|\mathbf{u}\|^2 \\
&\quad - C_2 \delta_0 c \|\mathbf{u}\|^2 (\|\mathbf{x}^{\natural}\| + \|\mathbf{x}\|)^2) \quad (\text{From Proposition 5}) \\
&= \|\mathbf{u}\|^2 8c \left( \left( 8 \frac{\langle \mathbf{u}, \mathbf{x}^+ \rangle^2}{\|\mathbf{u}\|^2} + 4\|\mathbf{x}^+\|^2 - 2r'^2 \|\mathbf{x}^{\natural}\|^4 - 2\|\mathbf{x}^{\natural}\|^2 \right) - \frac{C_2}{8} \delta_0 (\|\mathbf{x}^{\natural}\| + \|\mathbf{x}\|)^2 \right) \\
&= 8c \left( (8\langle \mathbf{u}, \mathbf{x}^+ \rangle^2 + 4\|\mathbf{x}^+\|^2 - 2r'^2 \|\mathbf{x}^{\natural}\|^4 - 2\|\mathbf{x}^{\natural}\|^2) - \frac{C_2}{8} \delta_0 (\|\mathbf{x}^{\natural}\| + \|\mathbf{x}\|)^2 \right) \\
&= 8c \left( \left( 8\langle \mathbf{u}, \mathbf{x}^+ - (\mathbf{x}^{\natural})^{\phi(\mathbf{x})} + (\mathbf{x}^{\natural})^{\phi(\mathbf{x})} \rangle^2 + 4\|\mathbf{x}^+ - (\mathbf{x}^{\natural})^{\phi(\mathbf{x})} + (\mathbf{x}^{\natural})^{\phi(\mathbf{x})}\|^2 - 2r'^2 \|\mathbf{x}^{\natural}\|^4 - 2\|\mathbf{x}^{\natural}\|^2 \right) \right. \\
&\quad \left. - \frac{C_2}{8} \delta_0 (\|\mathbf{x}^{\natural}\| + \|\mathbf{x}\|)^2 \right) \\
&\geq 8c \left( \left( 8\langle \mathbf{u}, (\mathbf{x}^{\natural})^{\phi(\mathbf{x})} \rangle^2 + 16\langle \mathbf{u}, \mathbf{x}^+ - (\mathbf{x}^{\natural})^{\phi(\mathbf{x})} \rangle \langle \mathbf{u}, (\mathbf{x}^{\natural})^{\phi(\mathbf{x})} \rangle + 4\|(\mathbf{x}^{\natural})^{\phi(\mathbf{x})}\|^2 \right. \right. \\
&\quad \left. \left. + 8\langle \mathbf{x}^+ - (\mathbf{x}^{\natural})^{\phi(\mathbf{x})}, (\mathbf{x}^{\natural})^{\phi(\mathbf{x})} \rangle - 2\|\mathbf{x}^{\natural}\|^2 - 2r'^2 \|\mathbf{x}^{\natural}\|^4 \right) - \frac{C_2}{8} \delta_0 (\|\mathbf{x}^{\natural}\| + \|\mathbf{x} - \mathbf{x}^{\natural} e^{i\phi(\mathbf{x})}\| + \|\mathbf{x}^{\natural} e^{i\phi(\mathbf{x})}\|)^2 \right) \\
&\geq 8c \left( 8r'^2 \|\mathbf{x}^{\natural}\|^4 - 16\|\mathbf{x} - \mathbf{x}^{\natural} e^{i\phi(\mathbf{x})}\| \|\mathbf{x}^{\natural}\| + 4\|\mathbf{x}^{\natural}\|^2 - 8\|\mathbf{x} - e^{i\phi(\mathbf{x})}\| \|\mathbf{x}^{\natural}\| - 2r'^2 \|\mathbf{x}^{\natural}\|^4 - 2\|\mathbf{x}^{\natural}\|^2 \right. \\
&\quad \left. - \frac{C_2}{8} \delta_0 (4\|\mathbf{x}^{\natural}\|^2 + 4\|\mathbf{x} - \mathbf{x}^{\natural} e^{i\phi(\mathbf{x})}\| \|\mathbf{x}^{\natural}\| + \|\mathbf{x} - \mathbf{x}^{\natural} e^{i\phi(\mathbf{x})}\|^2) \right) \\
&= 8c \left( 6r'^2 \|\mathbf{x}^{\natural}\|^4 - 24\|\mathbf{x} - \mathbf{x}^{\natural} e^{i\phi(\mathbf{x})}\| \|\mathbf{x}^{\natural}\| + 2\|\mathbf{x}^{\natural}\|^2 \right. \\
&\quad \left. - \frac{C_2}{8} \delta_0 (4\|\mathbf{x}^{\natural}\|^2 + 4\|\mathbf{x} - \mathbf{x}^{\natural} e^{i\phi(\mathbf{x})}\| \|\mathbf{x}^{\natural}\| + \|\mathbf{x} - \mathbf{x}^{\natural} e^{i\phi(\mathbf{x})}\|^2) \right) \\
&\geq 8c \left( 2\|\mathbf{x}^{\natural}\|^2 - 24\|\mathbf{x} - \mathbf{x}^{\natural} e^{i\phi(\mathbf{x})}\| \|\mathbf{x}^{\natural}\| - \frac{C_2}{8} \delta_0 (4\|\mathbf{x}^{\natural}\|^2 + 4\|\mathbf{x} - \mathbf{x}^{\natural} e^{i\phi(\mathbf{x})}\| \|\mathbf{x}^{\natural}\| + \|\mathbf{x} - \mathbf{x}^{\natural} e^{i\phi(\mathbf{x})}\|^2) \right).
\end{aligned}$$

Assume  $\|\mathbf{x} - \mathbf{x}^{\natural} e^{i\phi(\mathbf{x})}\| \leq \|\mathbf{x}^{\natural}\|$ . If we have

$$2\|\mathbf{x}^{\natural}\|^2 - 24\|\mathbf{x} - \mathbf{x}^{\natural} e^{i\phi(\mathbf{x})}\| \|\mathbf{x}^{\natural}\| \geq \frac{C_2}{8} \delta_0 (5\|\mathbf{x}^{\natural}\|^2 + 4\|\mathbf{x} - \mathbf{x}^{\natural} e^{i\phi(\mathbf{x})}\| \|\mathbf{x}^{\natural}\|),$$

then we have  $\mathbf{u}^T \mathbf{H}_f \mathbf{u} > 0$ .

Let  $\mathcal{G}$  be the set of global minimizers of  $f$ , define:

$$\begin{aligned}
\mathcal{R}_{\delta_0}^3 &= \left\{ 2\|\mathbf{x}^{\natural}\|^2 - 24\|\mathbf{x} - \mathbf{x}^{\natural} e^{i\phi(\mathbf{x})}\| \|\mathbf{x}^{\natural}\| \geq \frac{C_2}{8} \delta_0 (5\|\mathbf{x}^{\natural}\|^2 + 4\|\mathbf{x} - \mathbf{x}^{\natural} e^{i\phi(\mathbf{x})}\| \|\mathbf{x}^{\natural}\|) \right\} \\
&\cap \left\{ \|\mathbf{x} - \mathbf{x}^{\natural} e^{i\phi(\mathbf{x})}\| \leq \|\mathbf{x}^{\natural}\| \right\} \\
&= \left\{ \mathbf{x} \mid d(\mathbf{x}, \mathcal{G}) \leq \min \left( 1, \frac{2 - \frac{5}{8} C_2 \delta_0}{24 + \frac{4}{8} C_2 \delta_0} \right) \right\} \\
&= \left\{ \mathbf{x} \mid d(\mathbf{x}, \mathcal{G}) \leq \frac{16 - 5C_2 \delta_0}{192 + 4C_2 \delta_0} \right\}. \tag{30}
\end{aligned}$$

For  $\delta_0$  small enough, note that  $R_{\delta_0}^3$  strictly contains the set of global minimizers  $\mathbf{x}^{\natural} e^{i\theta}$ .

Assume that there is a local minimum at  $\mathbf{x}^+ \in \mathbb{R}_{\delta_0}^3$ . Write:

$$\gamma(t) = t\mathbf{x}^+ + (1-t)\cos(\phi(\mathbf{x}))\mathbf{x}^{\natural+} + (1-t)\sin(\phi(\mathbf{x}))\mathbf{x}^{\natural-}.$$

Consider  $h(t) = f(\gamma(t))$ , we have (with  $\mathbf{x}^+ = \mathbf{v} + r\cos(\phi(\mathbf{x}))\mathbf{x}^{\natural+} + r\sin(\phi(\mathbf{x}))\mathbf{x}^{\natural-}$ ):

$$\begin{aligned} h''(t) &= \left(\frac{d\gamma(t)}{dt}\right)^T \mathbf{H}_f(\gamma(t)) \left(\frac{d\gamma(t)}{dt}\right) + \nabla f(\gamma(t)) \cdot \frac{d^2(\gamma(t))}{dt^2} \\ &= \left(\frac{d\gamma(t)}{dt}\right)^T \mathbf{H}_f(\gamma(t)) \left(\frac{d\gamma(t)}{dt}\right). \end{aligned} \quad (31)$$

Notice that  $\frac{d\gamma(t)}{dt}$  can be written as  $r'(\cos(\phi(\mathbf{x}))\mathbf{x}^{\natural+} + \sin(\phi(\mathbf{x}))\mathbf{x}^{\natural-}) + \mathbf{v}'$ , therefore  $h''(t) > 0$ , so  $h$  is strictly convex. As  $h(0)$  is a global min of  $h$ ,  $h(1)$  cannot be a critical of  $h$ , and therefore  $\mathbf{x}$  cannot be a critical point of  $f$  if  $\mathbf{x} \neq \mathbf{x}^{\natural}e^{i\theta}$  for some  $\theta$ .  $\square$

#### A.2.7 PROOF OF PROPOSITION 8

*Proof.* Recall that:

$$\nabla g(\mathbf{x}^+) = 8c(4\mathbf{x}^+\|\mathbf{x}^+\|^2 - 2\mathbf{x}^+\|\mathbf{x}^{\natural+}\|^2 - 2\mathbf{x}^{\natural+}\langle\mathbf{x}^+, \mathbf{x}^{\natural+}\rangle - 2\mathbf{x}^{\natural-}\langle\mathbf{x}^{\natural-}, \mathbf{x}^+\rangle).$$

We have:

$$\|\nabla g(\mathbf{x}^+)\|^2 \underset{\|\mathbf{x}\| \rightarrow +\infty}{\sim} (32c)^2 \|\mathbf{x}\|^6.$$

Therefore from (8), if we take  $\delta_0$  such that:

$$(32c)^2 > (C_1\delta_0c)^2 \iff \delta_0 < \frac{32}{C_1}.$$

Then  $\mathcal{R}_{\delta_0}^1$  contains all  $\mathbf{x}$  for  $\|\mathbf{x}\|$  large enough. Then there exists some  $K$  compact such that for all  $\delta_0 \leq \frac{16}{C_1}$ , we have  $\mathbf{x} \in \mathcal{R}_{\delta_0}^1$  for all  $\mathbf{x} \notin K$ . Let  $E$  be an open set containing the critical points  $\mathcal{C}$  of  $g$ .  $K \setminus E$  is a compact also, therefore the function  $\frac{\|\nabla g(\mathbf{x}^+)\|}{C_1c(\|\mathbf{x}\| + \|\mathbf{x}^{\natural}\|)^3}$  attains its minimum on  $K \setminus E$ . Take  $\delta_0$  strictly below this minimum, and from (8),  $\mathcal{R}_{\delta_0}^1$  contains all  $K \setminus E$ .

Now let's consider a critical point of  $g(\mathbf{x}^+)$ . We can see that:

Assume  $\mathbf{x}^+$  is a critical point.

- If  $\|\mathbf{x}^+\|^2 = \frac{1}{2}\|\mathbf{x}^{\natural+}\|^2$ , then we must have  $\langle\mathbf{x}^+, \mathbf{x}^{\natural+}\rangle = 0$  and  $\langle\mathbf{x}^+, \mathbf{x}^{\natural-}\rangle = 0$  as  $\mathbf{x}^{\natural+}$  is orthogonal to  $\mathbf{x}^{\natural-}$ , which means that  $\|\mathbf{x}\|^2 = \frac{1}{2}\|\mathbf{x}^{\natural}\|^2$  and that  $|\langle\mathbf{x}, \mathbf{x}^{\natural}\rangle|^2 = \langle\mathbf{x}^+, \mathbf{x}^{\natural+}\rangle^2 + \langle\mathbf{x}^+, \mathbf{x}^{\natural-}\rangle^2 = 0$ . In that case using Proposition 6,  $\mathbf{x}$  is strictly in  $\mathcal{R}_{\delta_0}^2$  for  $\delta_0$  small enough.

- If  $\|\mathbf{x}^+\|^2 \neq \frac{1}{2}\|\mathbf{x}^{\natural+}\|^2$ , then  $\mathbf{x}^+$  must be in  $\text{Span}\{\mathbf{x}^{\natural+}, \mathbf{x}^{\natural-}\}$ , let's write  $\mathbf{x}^+ = \mu\mathbf{x}^{\natural+} + \nu\mathbf{x}^{\natural-}$ . We must have:

$$\begin{cases} 4\mu(\mu^2 + \nu^2) - 4\mu = 0 \\ 4\nu(\mu^2 + \nu^2) - 4\nu = 0 \end{cases}$$

which gives either  $\mu^2 + \nu^2 = 1$ , or  $\mu = \nu = 0$ . If  $\mu = \nu = 0$ , then  $\mathbf{x} = 0$ , which is strictly in  $\mathcal{R}_{\delta_0}^2$  for  $\delta_0$  small enough. If  $\mu^2 + \nu^2 = 1$ , then  $\mathbf{x} = e^{i\theta}\mathbf{x}^{\natural}$ , which is strictly in  $\mathcal{R}_{\delta_0}^3$  for  $\delta_0$  small enough.

Therefore the set of critical points  $\mathcal{C}$  is in  $E := \text{Int}(\mathcal{R}_{\delta_0}^2 \cup \mathcal{R}_{\delta_0}^3)$ , the interior of  $\mathcal{R}_{\delta_0}^2 \cup \mathcal{R}_{\delta_0}^3$  for  $\delta_0$  small enough, and from the previous argument we must have for  $\delta_0$  small enough:

$$\mathcal{R}_{\delta_0}^1 \cup \mathcal{R}_{\delta_0}^2 \cup \mathcal{R}_{\delta_0}^3 = \mathbb{R}^{2n}.$$

$\square$



### A.3 PROOF OF GLOBAL CONVERGENCE

#### A.3.1 PROOF OF PROPOSITION 9

*Proof.* Since  $\mathbf{A}_i$  is real symmetric and positive semidefinite for all  $i = 1, \dots, m$ , by orthogonal decomposition, we can write  $\mathbf{A}_i = \sum_{j=1}^r \lambda_{ij} \mathbf{v}_{ij} \mathbf{v}_{ij}^\top$ , where  $(\mathbf{v}_{ij})_{j=1}^r$  are orthonormal, for some  $1 \leq r \leq n$  and  $\lambda_{ij} > 0$  for all  $j = 1, \dots, r$ . Define

$$V := \text{Span}\{\mathbf{v}_{ij} : i = 1, \dots, m, j = 1, \dots, r\}.$$

Notice that

$$\nabla f(\mathbf{x}^+) = 4 \sum_{i=1}^m (\langle \mathbf{A}_i \mathbf{x}^+, \mathbf{x}^+ \rangle - b_i) \mathbf{A}_i \mathbf{x}^+ = 4 \sum_{i=1}^m \sum_{j=1}^r \lambda_{ij} \langle \mathbf{v}_{ij}, \mathbf{x}^+ \rangle (\langle \mathbf{A}_i \mathbf{x}^+, \mathbf{x}^+ \rangle - b_i) \mathbf{v}_{ij} \in V.$$

Therefore,  $\nabla f(\mathbf{x}^+) \in V$  for all  $\mathbf{x}^+ \in \mathbb{R}^{2n}$ . Denote  $V^\perp$  as the orthogonal complement of the subspace  $V$ , then for any given initial point  $\mathbf{x}_0^+$ , the solution  $\mathbf{x}^+(\cdot)$  to (13) can be decomposed as  $\mathbf{x}^+(t) = \mathbf{x}_V^+(t) + \mathbf{x}_{V^\perp}^+(t)$ , where  $\mathbf{x}_V^+(t) \in V$  and  $\mathbf{x}_{V^\perp}^+(t) \in V^\perp$  for all  $t \geq 0$ . Note that  $(\mathbf{x}^+)'(t) = -\nabla f(\mathbf{x}^+(t)) \in V$ , thus  $\mathbf{x}_{V^\perp}^+(t) \equiv \mathbf{x}_{V^\perp}^+(0)$  and we write  $\mathbf{x}^+(t) = \mathbf{x}_V^+(t) + \mathbf{x}_{V^\perp}^+(0)$  for all  $t \geq 0$ . Since  $f(\mathbf{x}^+)$  is a decreasing function over  $t \geq 0$ ,

$$\begin{aligned} \sum_{j=1}^r \lambda_{ij} \langle \mathbf{v}_{ij}, \mathbf{x}^+(t) \rangle^2 &= |\langle \mathbf{A}_i \mathbf{x}^+(t), \mathbf{x}^+(t) \rangle| \leq \sqrt{2(\langle \mathbf{A}_i \mathbf{x}^+(t), \mathbf{x}^+(t) \rangle - b_i)^2 + 2b_i^2} \\ &\leq \sqrt{2f(\mathbf{x}^+(t)) + 2b_i^2} \leq \sqrt{2f(\mathbf{x}_0^+) + 2b_i^2}. \end{aligned}$$

Recall that  $\lambda_{ij} > 0$  for all  $j = 1, \dots, r$ , hence  $\langle \mathbf{v}_{ij}, \mathbf{x}^+(t) \rangle$  is bounded over  $t \geq 0$  and so is  $\langle \mathbf{v}_{ij}, \mathbf{x}_V^+(t) \rangle$ . As  $\text{Span}\{\mathbf{v}_{ij} : i = 1, \dots, m, j = 1, \dots, r\} = V$ , we can extract a basis of vectors  $\mathbf{v}_{ij}$  to form a basis of  $V$ , and denote this basis as  $\{\mathbf{u}_\ell : \ell = 1, \dots, d\}$ . Then one can write  $\mathbf{x}_V^+(t) = \sum_{\ell=1}^d \zeta_\ell(t) \mathbf{u}_\ell$ . Notice that for each  $\ell = 1, \dots, d$ , there must exist  $(i_\ell, j_\ell)$  such that  $\mathbf{v}_{i_\ell j_\ell} = \mathbf{u}_\ell$ . Thus,

$$\|\mathbf{x}_V^+(t)\|^2 = \sum_{\ell=1}^d \zeta_\ell(t)^2 = \sum_{\ell=1}^d \langle \mathbf{u}_\ell, \mathbf{x}_V^+(t) \rangle^2 = \sum_{\ell=1}^d \langle \mathbf{v}_{i_\ell j_\ell}, \mathbf{x}_V^+(t) \rangle^2$$

is bounded over  $t \geq 0$ . Finally,  $\mathbf{x}^+(t) = \mathbf{x}_V^+(t) + \mathbf{x}_{V^\perp}^+(0)$  is bounded over  $t \geq 0$ .  $\square$

### A.4 PROOF OF CONCENTRATION RESULTS

#### A.4.1 PROOF OF PROPOSITION 10

*Proof.* We can just look at the expectation entrywise. We can notice that:

$$\begin{aligned} \mathbb{E} \left( \left( \sum_i (\mathbf{a}_i^+)^{\otimes 4} \right)_{i_1, i_2, i_3, i_4} \right) &= m \sigma^4 \mathbb{E} \left( \left( \left( \frac{\mathbf{a}_1^+}{\sigma} \right)^{\otimes 4} \right)_{i_1, i_2, i_3, i_4} \right) \\ &= m \sigma^4 \mathbb{E} \left( \left( \frac{\mathbf{a}_1^+}{\sigma} \right)_{i_1} \left( \frac{\mathbf{a}_1^+}{\sigma} \right)_{i_2} \left( \frac{\mathbf{a}_1^+}{\sigma} \right)_{i_3} \left( \frac{\mathbf{a}_1^+}{\sigma} \right)_{i_4} \right). \end{aligned} \quad (32)$$

All entries of  $\mathbf{a}_1^+$  are independent and centered, so if one index among  $i_1, i_2, i_3, i_4$  is different from the three others, the expectation is zero. If not, we can have either  $i_1 = i_2 \neq i_3 = i_4$  or  $i_1 = i_3 \neq i_2 = i_4$  or  $i_1 = i_4 \neq i_2 = i_3$  or  $i_1 = i_2 = i_3 = i_4$ , in the first three cases:

$$\mathbb{E} \left( \left( \frac{\mathbf{a}_1^+}{\sigma} \right)_{i_1} \left( \frac{\mathbf{a}_1^+}{\sigma} \right)_{i_2} \left( \frac{\mathbf{a}_1^+}{\sigma} \right)_{i_3} \left( \frac{\mathbf{a}_1^+}{\sigma} \right)_{i_4} \right) = \mathbb{E} \left( \left( \frac{\mathbf{a}_1^+}{\sigma} \right)_1^2 \left( \frac{\mathbf{a}_1^+}{\sigma} \right)_2^2 \right) = 1$$

and in the last case:

$$\mathbb{E} \left( \left( \frac{\mathbf{a}_1^+}{\sigma} \right)_{i_1} \left( \frac{\mathbf{a}_1^+}{\sigma} \right)_{i_2} \left( \frac{\mathbf{a}_1^+}{\sigma} \right)_{i_3} \left( \frac{\mathbf{a}_1^+}{\sigma} \right)_{i_4} \right) = \mathbb{E} \left( \left( \frac{\mathbf{a}_1^+}{\sigma} \right)_1^4 \right) = 3$$

which achieves the proof.  $\square$

## A.4.2 PROOF OF PROPOSITION 11

*Proof.* As define in Even & Massoulié (2021), we denote for some tensor  $\mathbf{R}$

$$\|\mathbf{R}\|_{\text{op}} = \sup_{\|\mathbf{u}_1 \otimes \mathbf{u}_2 \otimes \mathbf{u}_3 \otimes \mathbf{u}_4\|=1} \left| \sum_{i_1, i_2, i_3, i_4} \mathbf{R}_{i_1, i_2, i_3, i_4} (\mathbf{u}_1)_{i_1} (\mathbf{u}_2)_{i_2} (\mathbf{u}_3)_{i_3} (\mathbf{u}_4)_{i_4} \right|.$$

According to Even & Massoulié (2021), as  $\frac{\mathbf{a}_i^+}{\sigma}$  follow  $\mathcal{N}(\mathbf{0}, \mathbf{I}_n)$  and  $\mathbb{E}(\mathbf{T}) = \mathbf{S}$ , we have for some absolute constant  $C > 0$ ,

$$\mathbb{P} \left( \|\mathbf{T} - \mathbf{S}\|_{\text{op}} \geq C \sqrt{\frac{n + \log n + \beta m}{m}} \right) \leq e^{-\beta m}.$$

For  $m \geq Kn$ , as  $\log n \leq n$ , we have,

$$C \sqrt{\frac{n + \log n + \beta m}{m}} \leq C \sqrt{\frac{2}{K}} + \beta.$$

If we take  $K$  large enough and  $\beta > 0$  small enough (e.g.,  $\beta < \delta_0^2/(2C^2)$  and  $K > 4C/\delta_0^2$ ), then the right handside is strictly lower than  $\delta_0$ . For such  $\beta, K > 0$ ,

$$\mathbb{P}(\|\mathbf{T} - \mathbf{S}\|_{\text{op}} < \delta_0) \geq 1 - e^{-\beta m}.$$

□
